# Supplementary material
Source: PubMed Central journal article supplement (PMC2117287)
Supplement: thorax_thx.2006.069872_1.pdf [file thorax_thx.2006.069872_1.pdf]

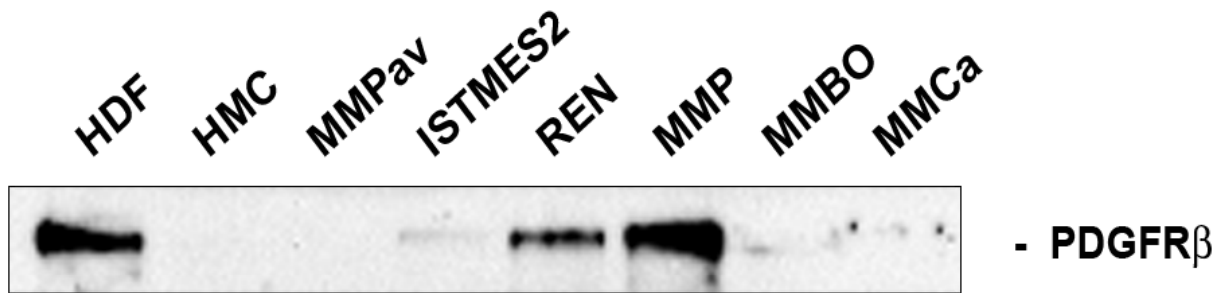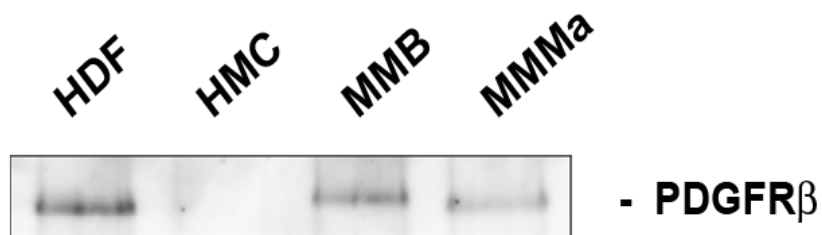

## Supplementary Fig. 1

### PDGFR $\beta$ expression in MMe cell lines.

Immunoblotting on whole lysates with PDGFR $\beta$  antibodies on HMC and eight established MMe cell lines.

Controls: HDF, Human Dermal Fibroblasts expressing PDGFR $\beta$ .
